# THE AMERICAN JOURNAL OF PSYCHIATRY

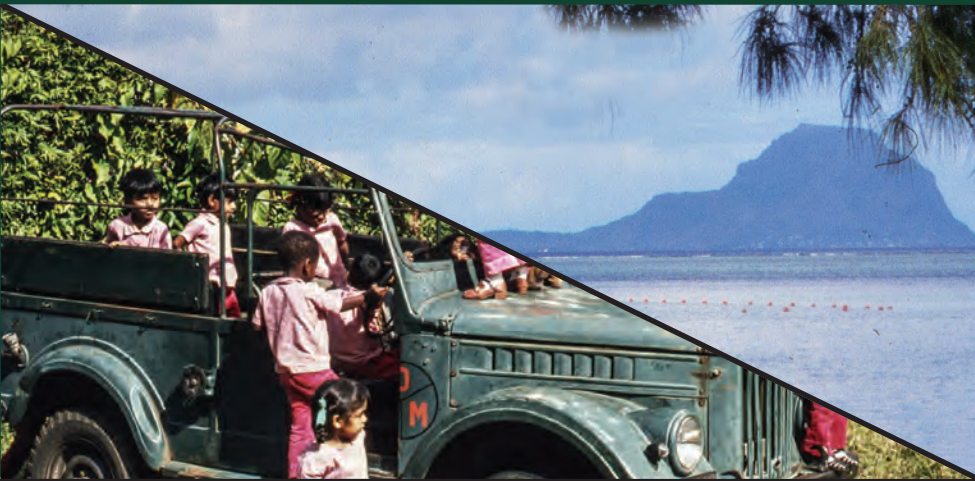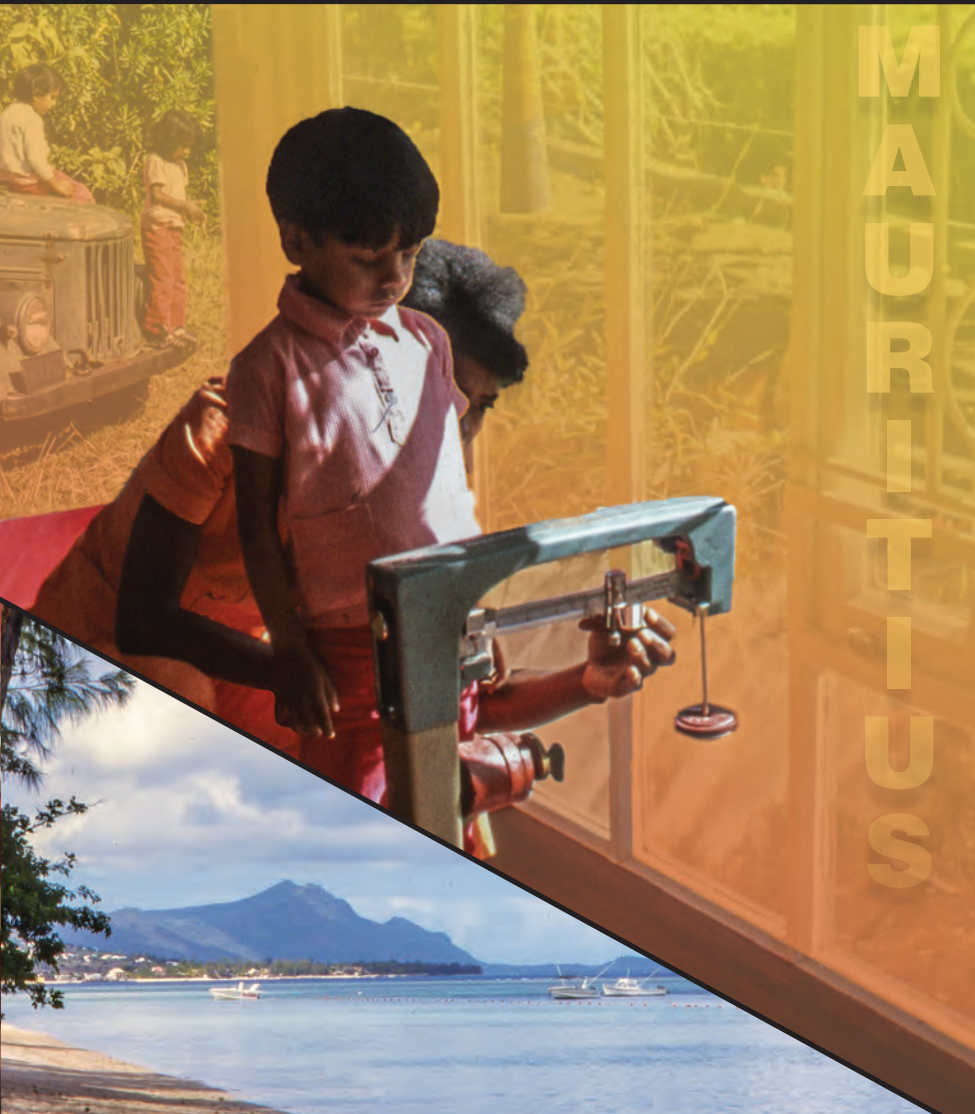

A Double-Blind Randomized  
Controlled Trial of  
*N*-Acetylcysteine in Cannabis-  
Dependent Adolescents

Kevin M. Gray, M.D., et al.

805

Metformin for Treatment of  
Antipsychotic-Induced Amenorrhea  
and Weight Gain in Women With  
First-Episode Schizophrenia

Ren-Rong Wu, M.D., Ph.D., et al.

813

◀ Poor Nutrition at Age 3 and  
Schizotypal Personality at Age 23:  
The Mediating Role of Age 11  
Cognitive Functioning

Peter H. Venables, Ph.D., and  
Adrian Raine, D. Phil.

822

Regional fMRI Hypoactivation and  
Altered Functional Connectivity  
During Emotion Processing  
in Nonmedicated Depressed  
Patients With Bipolar II Disorder

Nathalie Vizueta, Ph.D., et al.

831

Continuing Medical Education

881

August 2012

Volume 169 • Number 8

Official Journal of the  
AMERICAN PSYCHIATRIC ASSOCIATION

[ajp.psychiatryonline.org](http://ajp.psychiatryonline.org)
