# THE AMERICAN JOURNAL OF PSYCHIATRY

## EDITOR-IN-CHIEF

Robert Freedman, M.D.

## DEPUTY EDITORS

David A. Lewis, M.D.

Robert Michels, M.D.

Daniel S. Pine, M.D.

Susan K. Schultz, M.D.

Carol A. Tamminga, M.D.

## EDITORIAL STAFF

**Executive Editor**  
Michael D. Roy

**Senior Editor/Features Writer**  
Jane Weaver, E.L.S.

**Senior Editor**  
John J. Guardiano, Ph.D.

**Production Manager**  
Susan Westrate

**Assistant Editors**  
Katie Duffy  
Angela Moore

**Editorial Support Services  
Manager**  
Nicole Gray

**Editorial Assistant**  
Linda LaCour

**Editorial Assistant/  
Permissions Coordinator**  
Heidi Koch

**Assistants to the Editors**  
Lois Lilienthal  
Laura English  
Rachel Hogg  
Russell A. Scholl

## ASSOCIATE EDITORS

Kathleen T. Brady, M.D., Ph.D.

David A. Brent, M.D.

Linda Brzustowicz, M.D.

Cameron S. Carter, M.D.

Steven Hamilton, M.D., Ph.D.

Daniel C. Javitt, M.D.

Bankole Johnson, M.D.

Ellen Leibenluft, M.D.

Douglas F. Levinson, M.D.

Jeffrey A. Lieberman, M.D.

Barbara Milrod, M.D.

Maria A. Oquendo, M.D.

Jerrold F. Rosenbaum, M.D.

A. John Rush, M.D.

Larry J. Siever, M.D.

Patricia Suppes, M.D., Ph.D.

## EDITOR EMERITA

Nancy C. Andreasen, M.D., Ph.D.

## FORMER EDITORS

Amariah Brigham, M.D.  
1844-1849

T. Romeyn Beck, M.D.  
1849-1854

John P. Gray, M.D.  
1854-1886

G. Alder Blumer, M.D.  
1886-1894

Richard Dewey, M.D.  
1894-1897

Henry M. Hurd, M.D.  
1897-1904

Edward N. Brush, M.D.  
1904-1931

Clarence B. Farrar, M.D.  
1931-1965

Francis J. Braceland, M.D.  
1965-1978

John C. Nemiah, M.D.  
1978-1993

The American Journal of Psychiatry is online at [ajp.psychiatryonline.org](http://ajp.psychiatryonline.org)

# THE AMERICAN PSYCHIATRIC ASSOCIATION

1000 Wilson Blvd., Suite 1825, Arlington, VA 22209-3901  
(888) 357-7924 (toll-free inside the U.S. and Canada) / (703) 907-7300  
web site: [www.psych.org/](http://www.psych.org/) e-mail: [apa@psych.org](mailto:apa@psych.org)

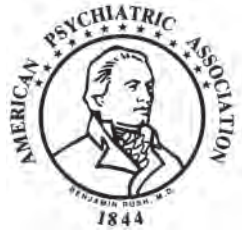

## OFFICERS 2012–2013

|                 |                            |
|-----------------|----------------------------|
| President       | Dilip V. Jeste, M.D.       |
| President-Elect | Jeffrey A. Lieberman, M.D. |
| Treasurer       | David Fassler, M.D.        |
| Secretary       | Roger Peele, M.D.          |

## ASSEMBLY

|               |                        |
|---------------|------------------------|
| Speaker       | R. Scott Benson, M.D.  |
| Speaker-Elect | Melinda L. Young, M.D. |
| Recorder      | Jenny L. Boyer, M.D.   |

## MEDICAL DIRECTOR'S OFFICE

|                          |                            |
|--------------------------|----------------------------|
| Medical Director and CEO | James H. Scully, Jr., M.D. |
|--------------------------|----------------------------|

## BOARD OF TRUSTEES

|                          |                            |
|--------------------------|----------------------------|
| Jeffrey Akaka, M.D.      | Judith F. Kashtan, M.D.    |
| Carol A. Bernstein, M.D. | Molly K. McVoy, M.D.       |
| Brian Crowley, M.D.      | James E. Ninninger, M.D.   |
| Jeffrey Geller, M.D.     | John M. Oldham, M.D.       |
| Marc David Graff, M.D.   | Alan F. Schatzberg, M.D.   |
| James A. Greene, M.D.    | Alik S. Widge, M.D., Ph.D. |

## PUBLISHER

Rebecca D. Rinehart

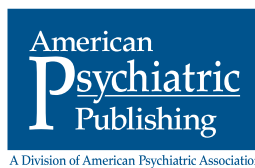

The American Journal of Psychiatry is online at [ajp.psychiatryonline.org](http://ajp.psychiatryonline.org)

THE AMERICAN PSYCHIATRIC ASSOCIATION  
Chairpersons of Councils, Commissions, Committees, and Task Forces

Standing Committees

**Bylaws**

Eric M. Plakun, M.D.

**Elections**

Robert E. Kelly, Jr., M.D.

**Ethics**

Richard D. Milone, M.D.

**Finance and Budget**

Frank W. Brown, M.D.

*Audit*

David Fassler, M.D.

*Investment Oversight*

Larry R. Faulkner, M.D.

**Joint Reference**

Jeffrey A. Lieberman, M.D.

**Membership**

Joseph Ezra V. Rubin, M.D.

**Nominating**

John M. Oldham, M.D.

**Tellers**

Tanya Nayyirah Alim, M.D.

**Council on Addiction Psychiatry**

John A. Renner, M.D.

**Council on Advocacy and Government Relations**

Robert Paul Cabaj, M.D.

*Advocacy and Litigation Funding*

Renee L. Binder, M.D.

**Council on Children, Adolescents, and Their Families**

Louis J. Kraus, M.D.

*Agnes Purcell McGavin Award*

*Blanche F. Ittleson Research Award*

Karen Dineen Wagner, M.D.

**Council on Communications**

Jeffrey A. Borenstein, M.D.

**Council on Geriatric Psychiatry**

Brent P. Forester, M.D.

**Council on Healthcare Systems and Financing**

Sul Ross Olen Thorward, M.D.

*Reimbursement for Psychiatric Care*

Bruce J. Schwartz, M.D.

*RBRVS, Codes and Reimbursement*

Ronald M. Burd, M.D.

**Council on Medical Education and Lifelong Learning**

Sandra Sexson, M.D.

*APA Public Psychiatry Fellowship Selection Committee*

Stephen M. Goldfinger, M.D.

*APA/SAMHSA Minority Fellowship Selection and Advisory*

Toi B. Harris, M.D.

*Scientific Program*

Joseph A. Cheong, M.D.

*Scientific Program Committee of the Institute on Psychiatric Services*

David Alan Pollack, M.D.

*Task Force to Update the Ethics Annotations*

Laura W. Roberts, M.D.

*Vestermark Award Committee*

Frederick G. Guggenheim, M.D.

**Council on Minority Health and Health Disparities**

Sandra C. Walker, M.D.

**Council on Psychiatry And Law**

Patricia R. Recupero, M.D., J.D.

*Isaac Ray/Human Rights Award*

Steven K. Hoge, M.D.

*Judicial Action*

Paul S. Appelbaum, M.D.

*Manfred S. Guttmacher Award*

Rebecca W. Brendel, M.D., J.D.

**Council on Psychosomatic Medicine  
(Consultation Liaison Psychiatry)**

Joel E. Dimsdale, M.D.

**Council on Research and Quality Care**

Joel Yager, M.D.

*Electronic Health Records*

Steven Roy Daviss, M.D.

*Psychiatric Dimensions of Disasters*

Robert J. Ursano, M.D.

*Research Awards*

Lewis L. Judd, M.D.

*Steering Committee on Practice Guidelines*

Joel Yager, M.D.

*Task Force on DSM-V*

David J. Kupfer, M.D.

*Task Force to Revise the Practice of Electroconvulsive Therapy*

Sarah H. Lisanby, M.D.

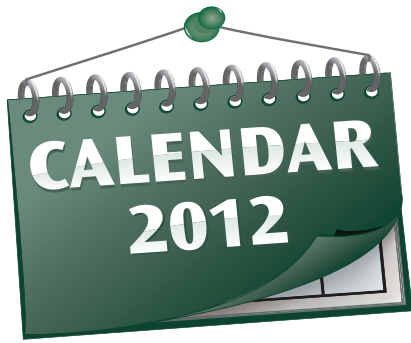

*For free listing of your organization's official annual or regional meeting, please send us the following information: sponsor, location, inclusive dates, type and number of continuing education credits (if available), and the name, address, and telephone number of the person or group to contact for more information. In order for an event to appear in our listing, all notices and changes must be received at least 6 months in advance of the meeting and should be addressed to:*

*Calendar, American Journal of Psychiatry, 1000 Wilson Boulevard, Suite 1825, Arlington, VA 22209-3901, [swestrade@psych.org](mailto:swestrade@psych.org) (e-mail).*

*Because of space limitations, only listings of meetings of the greatest interest to Journal readers may be included.*

---

## SEPTEMBER

**September 21–23**, 5th International Conference on Schizophrenia (ICONS V), Chennai, India. Organised by the Schizophrenia Research Foundation (India) in collaboration with Schizophrenia International Research Society. Co-sponsored by WPA, Indian Psychiatric Society. For details see [www.icons-scarf.org](http://www.icons-scarf.org).

**September 27–29**, 2nd International Congress on Borderline Personality Disorder and Allied Disorders, Amsterdam RAI Convention Center, The Netherlands. Contact Theo Ingenhoven, [Scientificcommittee@esspd.eu](mailto:Scientificcommittee@esspd.eu) (email); or [borderline2012@cpo-hanser.de](mailto:borderline2012@cpo-hanser.de) (email); <http://www.borderline-congress.org> (web site).

---

## OCTOBER

**October 3–5**, International Biennial Congress of the Marcé Society (International Society for the Understanding, Prevention and Treatment of Mental Illness Related to Childbearing), in collaboration with the Société Marcé Francophone, Paris, France (conducted

in English). Contact: Ms. Nicole Greer, 5034-A Thoroughbred Lane, Brentwood, TN 37027 USA; (615) 324-2362 (tel); [info@marcesociety.com](mailto:info@marcesociety.com) (email); [www.marcesociety.com](http://www.marcesociety.com) (web site).

**October 3–7**, Joint Meeting of the Southern Psychiatric Association; Maryland Psychiatric Society; and West Virginia Psychiatric Society, White Sulphur Springs, West Virginia (The Greenbrier). Contact Susan Proctor, (410) 938-3403; [www.sopsych.org](http://www.sopsych.org) (web site).

**October 4–7**, 64th Institute on Psychiatric Services, American Psychiatric Association, New York, NY. Contact: Jill Gruber, APA Annual Meetings Dept., 1000 Wilson Blvd., Ste. 1825, Arlington, VA 22209; (703) 907-7815.

---

## DECEMBER

**December 6–9**, 23rd Annual Meeting and Symposium, American Academy of Addiction Psychiatry, Turnberry Isle Hotel Miami, Aventura, Florida. Contact: Isabel Vieira, 400 Massasoit Ave, Suite 307 (2nd floor), East Providence, RI 02914; (401) 524-3076 (tel); [www.aaap.org/meetings-and-events](http://www.aaap.org/meetings-and-events) (web site).

---

## JUNE 2013

**June 6–9**, 4th World Congress on ADHD: From Childhood to Adult Disease, Milan, Italy. Contact Congress Organizer, +49-40-670 88 20 (tel); [adhd2013@cpo-hanser.de](mailto:adhd2013@cpo-hanser.de) (email); [www.adhd-congress.org](http://www.adhd-congress.org) (web site).

---

## JULY 2014

**July 8–13**, 28th International Congress of Applied Psychology, Palais des Congrès de Paris, France. Contact [exh@icap2014.com](mailto:exh@icap2014.com) (email); [www.icap2014.com](http://www.icap2014.com) (web site).

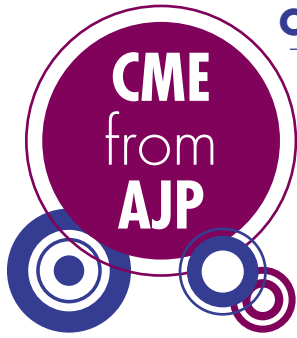

## Continuing Medical Education

Three articles in this issue form the basis of a short course with questions that can be answered for up to 1 AMA PRA Category 1 Credit™ each by visiting <http://psychiatryonline.org/cme.aspx> and clicking on the “American Journal of Psychiatry” tab.

CME credit is issued only online, and a paid subscription to the AJP CME course program is required.

This month's courses appear on pages 881–884.

FREE AUDIO!

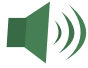

## Have You Heard?

You can listen to highlights of *The American Journal of Psychiatry* by downloading a monthly free .mp3 audio file from our web site (<http://ajp.psychiatryonline.org/audio.aspx#>) or by subscribing to the AJP Audio podcast at iTunes or other feed reader. Presented by Deputy Editor Dr. Susan Schultz or by Executive Editor Michael Roy, each month's audio lasts approximately 30 minutes and covers several research articles, the Treatment in Psychiatry feature, and one or two editorials.

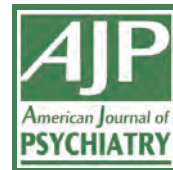

Coming in the September 2012 issue\*

## THE AMERICAN JOURNAL OF PSYCHIATRY

Change in Defense Mechanisms During Long-Term Dynamic Psychotherapy and 5-Year Outcome  
J.C. Perry and M. Bond

Cognitive Dysfunction and Anxious-Impulsive Personality Traits Are Endophenotypes  
for Drug Dependence

K.D. Ersche, A.J. Turton, S.R. Chamberlain, U. Müller, E.T. Bullmore, and T.W. Robbins

A Randomized, Double-Blind, Placebo-Controlled Trial of Oral Creatine Monohydrate  
Augmentation for Enhanced Response to a Selective Serotonin Reuptake Inhibitor in Women  
with Major Depressive Disorder

I.K. Lyoo, S. Yoon, T-S Kim, J. Hwang, J.E. Kim, W. Won, S. Bae, and P.F. Renshaw

Family Caregiver Interventions Can Reduce Behavioral and Psychological Symptoms  
of Dementia in the Community: A Meta-Analysis

H. Brodaty and C. Arasaratnam

\*Can't wait? Visit [ajp.psychiatryonline.org/AJPIAdvance.aspx](http://ajp.psychiatryonline.org/AJPIAdvance.aspx) to see all  
articles uploaded in advance of print!



## Contents

- A5 Editorial Board  
A7 Highlights of this issue

## Editorials

- 83 **Antipsychotics: is it time to introduce patient choice?**  
A. P. Morrison, P. Hutton, D. Shiers and D. Turkington
- 85 **Perspectives on the Incredible Years programme: psychological management of conduct disorder**  
T. Bywater
- 88 **Autism spectrum disorder: prevalence and cause may be bound together**  
E. Simonoff
- 90 **Adjustment disorder: implications for ICD-11 and DSM-5**  
P. Casey and A. Doherty

- 92 **King Lear – psychiatry in theatre**  
Jo Richards

## Review article

- 93 **Clinical recognition and recording of alcohol disorders by clinicians in primary and secondary care: meta-analysis**  
A. J. Mitchell, N. Meader, V. Bird and M. Rizzo

- 100 **What do psychiatrists have to offer sports competitors – in 100 words**  
Steve Peters

## Papers

- 101 **Reducing child conduct problems and promoting social skills in a middle-income country: cluster randomised controlled trial**  
H. Baker-Henningham, S. Scott, K. Jones and S. Walker
- 109 **Migration and autism spectrum disorder: population-based study**  
C. Magnusson, D. Rai, A. Goodman, M. Lundberg, S. Idring, A. Svensson, I. Koupil, E. Serlachius and C. Dalman
- 116 **The extreme male brain revisited: gender coherence in adults with autism spectrum disorder**  
S. Bejerot, J. M. Eriksson, S. Bonde, K. Carlström, M. B. Humble and E. Eriksson
- 124 **Childhood cognitive function and adult psychopathology: associations with psychotic and non-psychotic symptoms in the general population**  
J. H. Barnett, F. McDougall, M. K. Xu, T. J. Croudace, M. Richards and P. B. Jones
- 131 **Sexual dysfunction in people with prodromal or first-episode psychosis**  
T. Reis Marques, S. Smith, S. Bonaccorso, F. Gaughran, A. Koliakou, P. Dazzan, V. Mondelli, H. Taylor, M. DiForti, P. K. McGuire, R. M. Murray and O. D. Howes

- 136 **Cancer of the Vulva – poems by doctors**  
Ron Charach

- 137 **Adjustment disorders in primary care: prevalence, recognition and use of services**  
A. Fernández, J. M. Mendive, L. Salvador-Carulla, M. Rubio-Valera, J. V. Luciano, A. Pinto-Meza, J. M. Haro, D. J. Palao, J. A. Bellón, A. Serrano-Blanco and the DASMAP investigators

- 143 **Structure of major depressive disorder in adolescents and adults in the US general population**  
F. Lamers, M. Burstein, J.-p. He, S. Avenevoli, J. Angst and K. R. Merikangas

- 151 **Effect of antidepressive therapy on retinal contrast processing in depressive disorder**  
E. Bubl, D. Ebert, E. Kern, L. Tebartz van Elst and M. Bach

- 158 **Easy Listening – poem**  
Dino Campana

## Columns

- 159 Correspondence  
162 Book reviews  
166 Contents of *Advances in Psychiatric Treatment*  
167 Contents of the *American Journal of Psychiatry*  
168 From the Editor's desk

## Cover picture

Kim Noble (b. 1960) has gained international acclaim for both the originality of her work and the remarkable story of her life. From the age of 14 Kim spent over 20 years in and out of hospital until she was diagnosed with dissociative identity disorder. DID posits the existence of many identities within one person as 'alters'. Thirteen of Kim's alters paint, each with their own distinctive style, colours and themes, ranging from layered abstracts to challenging figurative works.

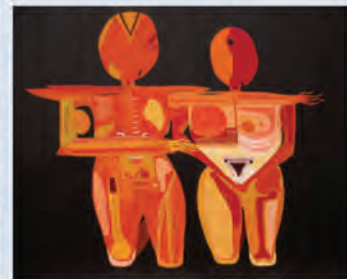

*Robot Couple* (2004) by Bonny: This is a painting that came from the middle of a small series of 'robot'-themed paintings. The robot design and shape express the feelings of change to the body following pregnancy, trauma and loss. Whilst the shapes provide an illusory figurative sense of a hopeful couple where the woman is pregnant, the painting is abstract, with the robotic design providing a contrasting emotional and physical experience. Everything that is usually interior to the body or covered up is outside and exposed. This was painted in acrylic on canvas, size 76cm x 102cm.

We are always looking for interesting and visually appealing images for the cover of the *Journal* and would welcome suggestions or pictures, which should be sent to Dr Allan Beveridge, British Journal of Psychiatry, 17 Belgrave Square, London SW1X 8PG, UK or [bjp@rcpsych.ac.uk](mailto:bjp@rcpsych.ac.uk).
