# THE AMERICAN JOURNAL OF PSYCHIATRY

## En este número

A10

### Perspectivas

#### Editoriales

- 771 **Tomando nota sobre los medicamentos de venta libre para adolescentes con dependencia del cannabis**  
Oscar G. Bukstein
- 774 **La metformina como tratamiento para los efectos secundarios de medicamentos antipsicóticos, con especial atención a las mujeres con esquizofrenia**  
Robert C. Smith
- 777 **Relación entre la desnutrición en la infancia y los trastornos mentales en la edad adulta**  
Ezra Susser **Audio**
- 780 **Altibajos de la reactividad de la amígdala en los trastornos bipolares**  
Ahmad R. Hariri

#### Imágenes en Psiquiatría

- 784 **Lanzamiento del programa de apoyo en salud mental para los trabajadores de la central nuclear de Fukushima Daiichi**  
Jun Shigemura, Takeshi Tanigawa, y Soichiro Nomura

#### Educación en Psiquiatría

- 785 **Diseño de estudios de casos y controles: decisiones acerca de los controles**  
Susan E. Hodge, Ryan L. Subaran, Myrna M. Weissman, y Abby J. Fyer

#### Revisión y Resumen

- 790 **Efectividad comparativa de los modelos de atención crónica colaborativa en escenarios de atención médica primaria, y salud mental especializada: revisión sistemática y meta-análisis**  
Emily Woltmann, yrew Grogan-Kaylor, Brian Perron, Hebert Georges, Amy M. Kilbourne, y Mark S. Bauer **Audio**

## Nuevas investigaciones

### Artículos

- 805 **Estudio doble ciego aleatorizado y controlado de la N-acetilcisteína en adolescentes dependientes del cannabis**  
Kevin M. Gray, Matthew J. Carpenter, Nathaniel L. Baker, Stacia M. DeSantis, Elisabeth Kryway, Karen J. Hartwell, Aimee L. McRae-Clark, y Kathleen T. Brady **Audio** **Guías clínicas** **Editorial** **EMC**
- 813 **La metformina para el tratamiento de amenorrea inducida por antipsicóticos e incremento de peso en mujeres con un primer episodio de esquizofrenia: estudio doble ciego, aleatorizado y controlado con placebo**  
Ren-Rong Wu, Hua Jin, Keming Gao, Elizabeth W. Twamley, Jian-Jun Ou, Ping Shao, Juan Wang, Xiao-Feng Guo, John M. Davis, Philip K. Chan, y Jing-Ping Zhao **Audio** **Guías clínicas** **Editorial**
- 822 **Mala nutrición a los 3 años y personalidad esquizotípica a los 23: el papel mediador del funcionamiento cognitivo de los 11 años**  
Peter H. Venables and Adrian Raine  
**Audio** **Editorial** **EMC**
- 831 **Hipoactividad documentada por resonancia magnética (fMRI) regional y conectividad funcional alterada durante el procesamiento de las emociones en pacientes deprimidos no medicados con Trastorno Bipolar II**  
Nathalie Vizueta, Jeffrey D. Rudie, Jennifer D. Townsend, Salvatore Torrisi, Teena D. Moody, Susan Y. Bookheimer, y Lori L. Altshuler **Editorial**
- 841 **Mayor respuesta de la amígdala a expresiones faciales tristes que a expresiones temerosas en depresión mayor: relación con el estado de ánimo y el tratamiento farmacológico**  
Danilo Arnone, Shane McKie, Rebecca Elliott, Emma J. Thomas, Darragh Downey, Gabriella Juhasz, Steve R. Williams, J.F. William Deakin, y Ian M. Anderson
- 851 **Disfunción persistente del receptor nicotínico acetilcolinérgico- $\beta_2^*$  en el trastorno depresivo mayor**  
Aybala Saricicek, Irina Esterlis, Kathleen H. Maloney, Yann S. Mineur, Barbara M. Ruf, Anjana Muralidharan, Jason I. Chen, Kelly P. Cosgrove, Rebecca Kerestes, Subroto Ghose, Carol A.

Tammaing, Brian Pittman, Frederic Bois, Gilles Tamagnan, John Seibyl, Marina R. Picciotto, Julie K. Staley, y Zubin Bhagwagar **EMC**

**860 Estimulación cerebral profunda de la porción anteromedial interna del globus pallidus en el síndrome de Tourette's severo**

Elisabeth Cannon, Peter Silburn, Terrence Coyne, Karen O'Maley, John D. Crawford, y Perminder S. Sachdev **Audio**

## Comunicados y actualizaciones

### Cartas al Editor

**867** Deterioro clínico agudo con inflamación sistémica como factor de riesgo en depresión: una interpretación alternativa de los datos

Mantenimiento a largo plazo con ketamina intramuscular para la depresión bipolar II resistente al tratamiento

**869 Corrección**

### Reseñas Bibliográficas

**870** Prevención en salud mental: perspectivas a largo plazo

La psicoterapia de la esperanza: el legado de la persuasión y la curación

Compilación de casos de psicoterapia interpersonal

Manual clínico para el tratamiento de la esquizofrenia

### Otros temas de interés

**875 Official Actions**

875 Tratamiento del trastorno de identidad de género

877 Informe anual de 2011 del American Board of Psychiatry and Neurology, Inc.

**881 Educación médica Continuada**

**A5 Directivos de la American Psychiatric Association**

**A7 Calendario**

**A9 British Journal of Psychiatry Contenidos**

### Cover

Este número presenta un estudio del Mauritius Child Health Project. Según este estudio, la intervención temprana para prevenir la desnutrición infantil, puede detener múltiples alteraciones cognitivas asociadas con acentuados rasgos interpersonales y de desorganización de la personalidad esquizotípica. Se encontró que un bajo coeficiente intelectual a los 11 años constituye el punto medio entre la anemia y el retraso en el crecimiento a los 3 años y la personalidad esquizotípica a los 23. De este modo se establece un orden temporal entre estas variables que permite documentar el mecanismo de acción. Diseño de la cubierta de Diane Janesko con fotos cedidas por el Dr. Venables.

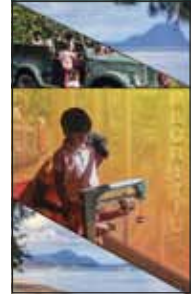

### Audio

artículo en *AJP Audio*: archivo .mp3 descargable de [ajp.psychiatryonline.org](http://ajp.psychiatryonline.org)

### Guías clínicas

este artículo ofrece guías clínicas (ver página "En este Número" o al final del artículo)

### EMC

existe un curso en línea que cubre los contenidos de este artículo para los suscriptores del programa de cursos de EMC del AJP

### Editorial

este artículo se discute en uno de los editoriales de este número

Presented in collaboration with the Office of Global Health,  
UMDNJ-Robert Wood Johnson Medical School

Translation courtesy of

Sergi Casals, M.S.

Carlos Lopez Jaramillo, M.D.

Universidad de Antioquia, Medellin, Colombia

and

Javier I. Escobar, M.D., M.Sc.

UMDNJ-Robert Wood Johnson Medical School

Consulte *The American Journal of Psychiatry* en línea en [ajp.psychiatryonline.org](http://ajp.psychiatryonline.org)
